# Supplementary material
Source: PubMed Central journal article supplement (PMC5363276)
Supplement: NIHMS851818-supplement-Figure_Permission.pdf [file NIHMS851818-supplement-Figure_Permission.pdf]

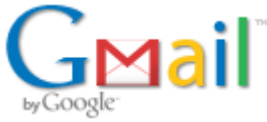

Emily Picillo &lt;epicillo@circulationjournal.org&gt;

---

**CIRCULATIONAHA/2016/024247R2 Decision Letter**

2 messages

---

**Yeh,Robert (Cardiology)** <ryeh@bidmc.harvard.edu>

Wed, Dec 14, 2016 at 10:26 PM

To: "epicillo@circulationjournal.org" &lt;epicillo@circulationjournal.org&gt;

Dear Emily,

Here is the email exchange I had with Dr. Spertus in which he gave permission to use the figure for the Personalized Decision Tools paper.

Let me know if this suffices.

Thanks,  
Bobby Yeh

---

**From:** Robert Yeh <ryeh@bidmc.harvard.edu>**Date:** Wednesday, August 17, 2016 at 5:12 PM**To:** John Spertus <spertusj@umkc.edu>**Subject:** Re: figure of the 3 different colored people

Ok will definitely do that.

So glad Daniel had a good experience. Please give him our best.

Bobby

Sent from my iPhone.

On Aug 17, 2016, at 5:06 PM, Spertus, John <spertusj@umkc.edu> wrote:

Hi Bobby,

Thanks again for the great mentorship you provided Daniel. He (and I) are so appreciative. I have not put that figure into a paper. It would be wonderful if you could say something like: 'courtesy of John Spertus' but it is totally up to you. Thanks for asking.

John

---

**From:** "Yeh,Robert (Cardiology)" <ryeh@bidmc.harvard.edu>**Date:** Wednesday, August 17, 2016 at 3:22 PM**To:** John Spertus <spertusj@umkc.edu>**Subject:** figure of the 3 different colored people

Hey John,

Hope Australia was terrific (I am assuming you are back in the US already?).

I have a quick question for you. I am writing a review/editorial type of paper on personalized care, and was going to create some rendition of the figure you often show with the different colored people representing differential benefit. If I create something akin to that for this paper, do you have a reference that I should say "adapted from ...."?

Bobby

---

This message is intended for the use of the person(s) to whom it may be addressed. It may contain information that is privileged, confidential, or otherwise protected from disclosure under applicable law. If you are not the intended recipient, any dissemination, distribution, copying, or use of this information is prohibited. If you have received this message in error, please permanently delete it and immediately notify the sender. Thank you.

---

**Emily Picillo** <epicillo@circulationjournal.org>  
To: "Yeh,Robert (Cardiology)" <ryeh@bidmc.harvard.edu>

Thu, Dec 15, 2016 at 11:24 AM

Thank you, Dr Yeh, this is sufficient.

Best,  
Emily

[Quoted text hidden]

--

Emily Picillo  
Managing Editor  
*Circulation*  
200 Fifth Avenue  
Suite 1020  
Waltham, MA 02451  
[epicillo@circulationjournal.org](mailto:epicillo@circulationjournal.org)  
781-902-4403
